# Supplementary material
Source: ML conference proceedings conference paper supplement (https://aclanthology.org/2024.findings-eacl.12)
Supplement: note [file model_pred_human_pred_v2.pdf › data/results/merged/figures/model_pred_human_pred_v2.pdf]

Rich et. al.

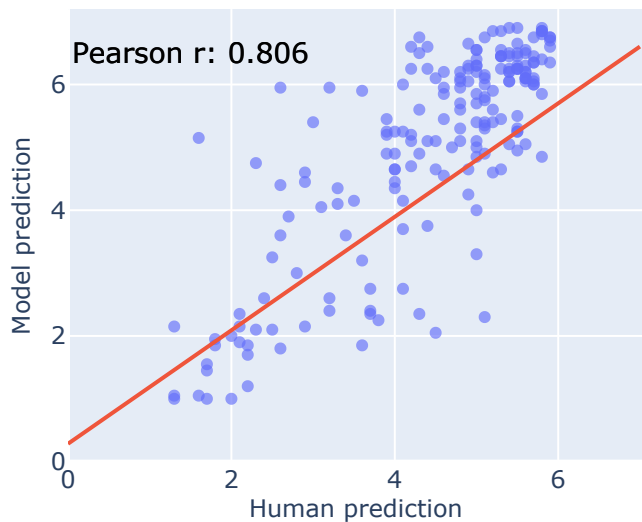

Chow et. al.

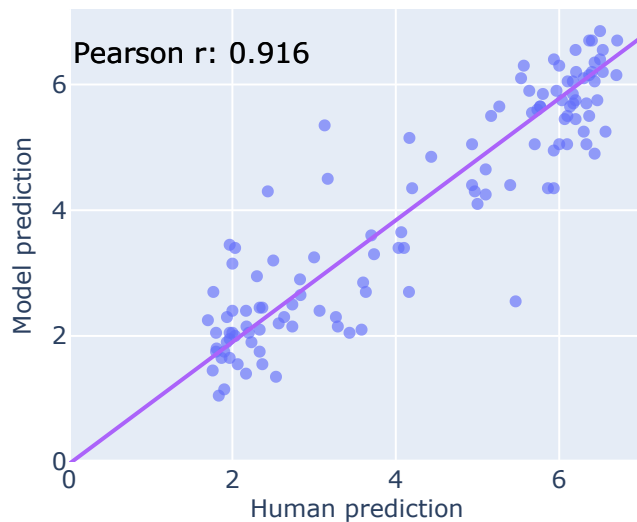

Huang et. al.

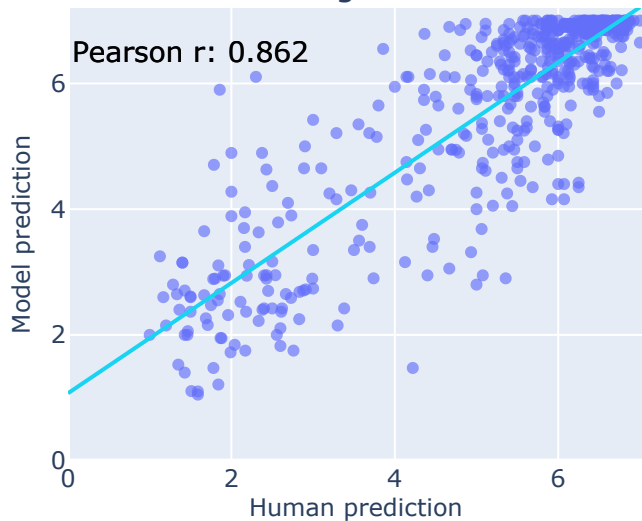

Ours

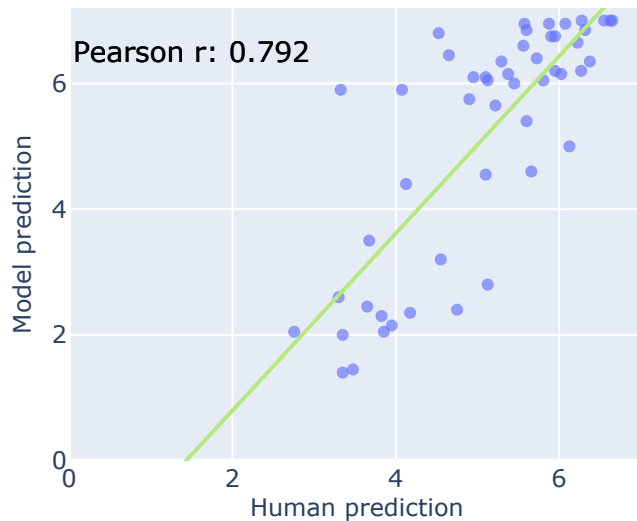

— Slope: 0.903, Intercept: 0.284

— Slope: 0.877, Intercept: 1.071

— Slope: 0.969, Intercept: -0.037

— Slope: 1.41, Intercept: -2.022
