# Supplementary material
Source: ML conference proceedings conference paper supplement (https://aclanthology.org/2024.findings-eacl.12)

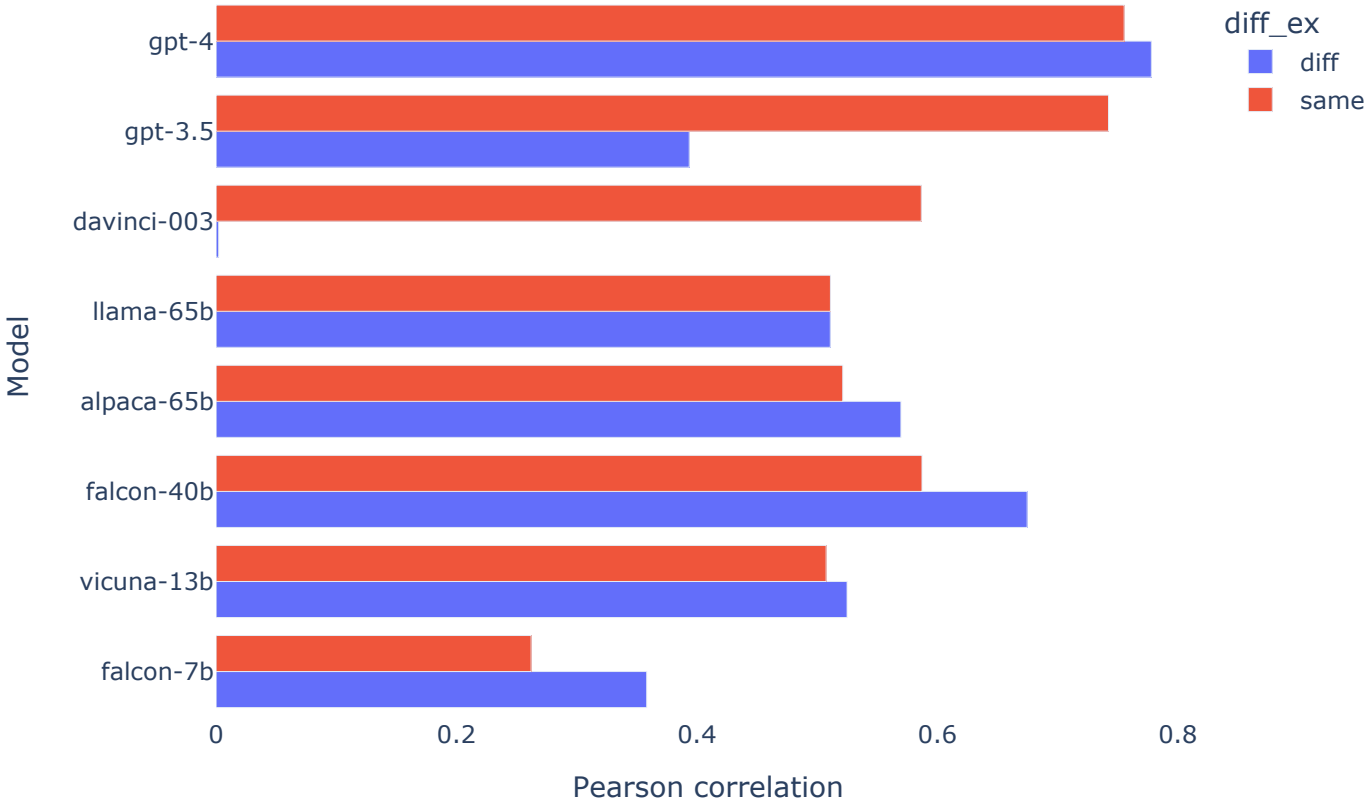

Supplement: note [file average_diff_add.pdf › data/results/merged/figures/average_diff_add.pdf]

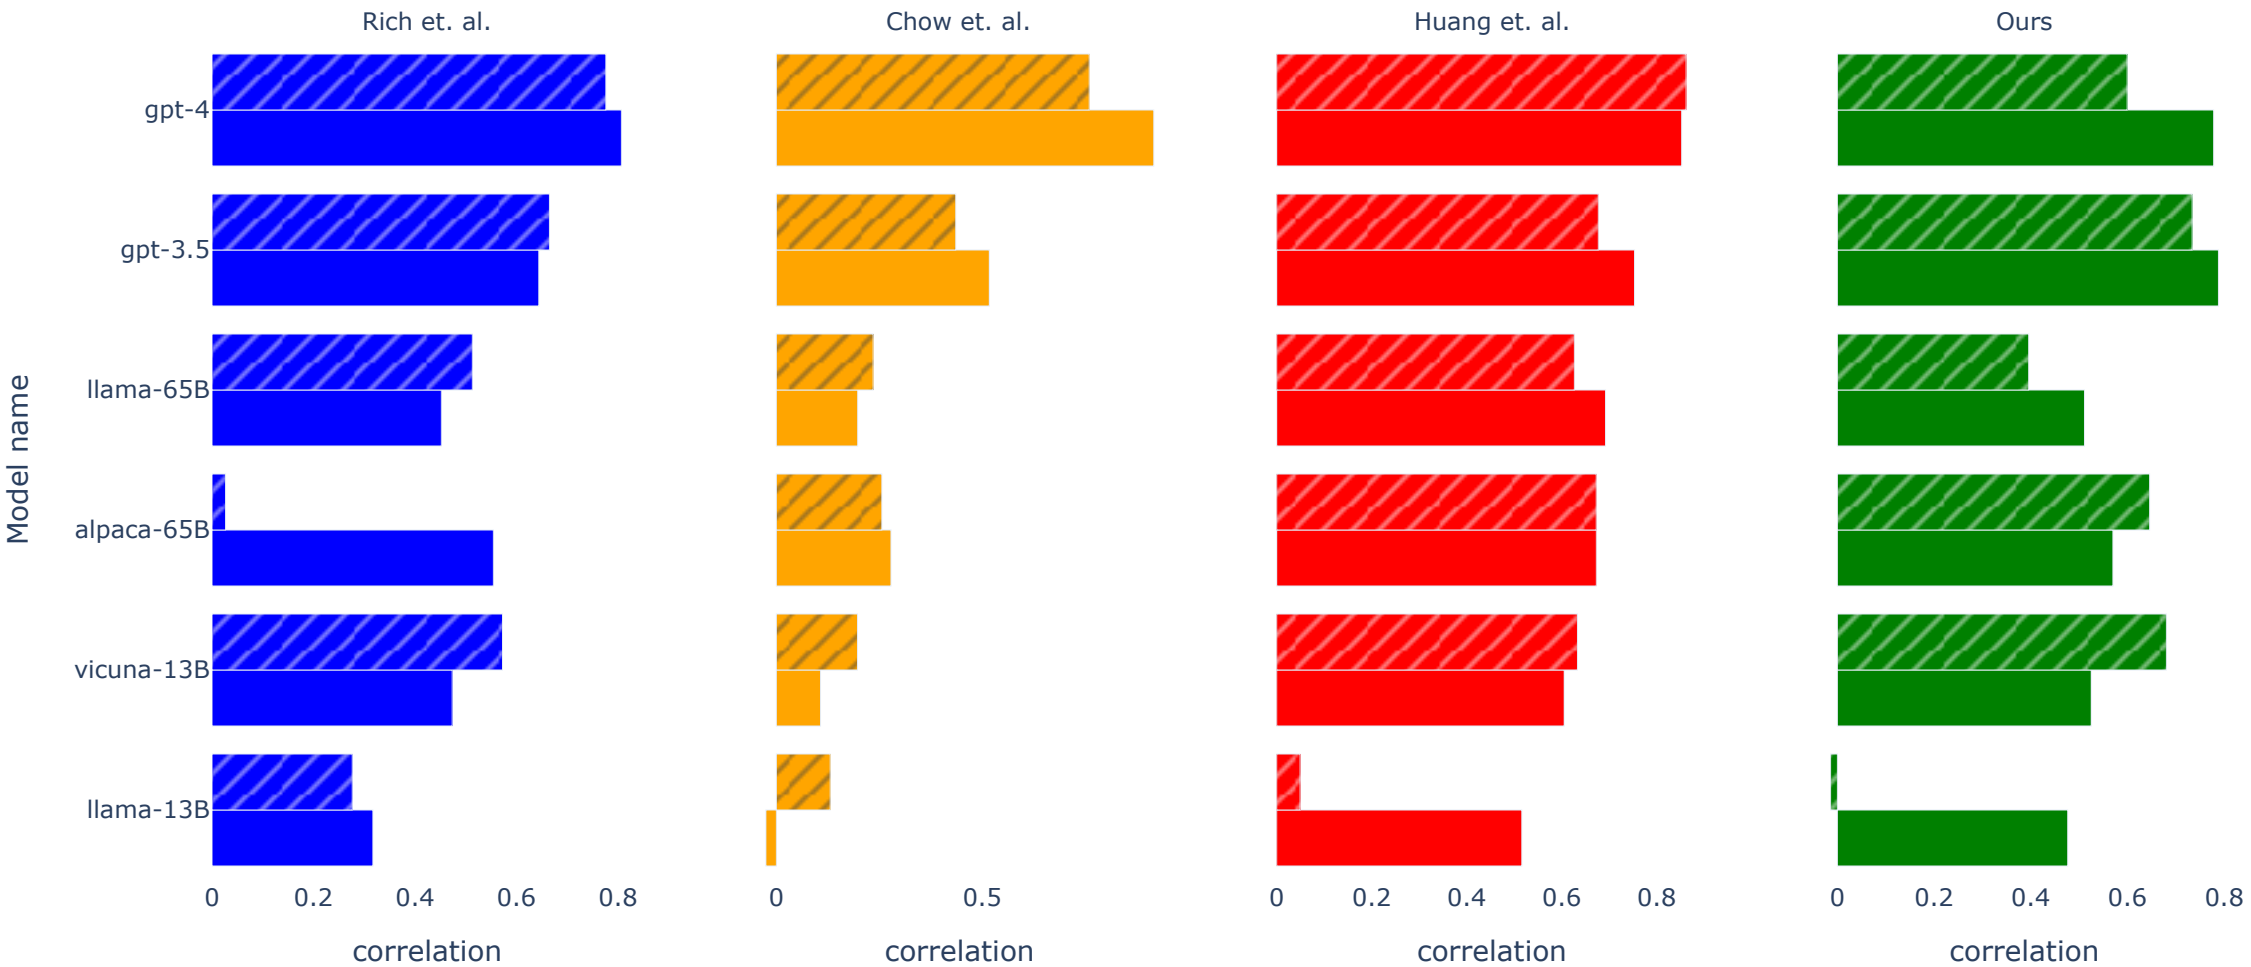

Supplement: note [file average_example_add.pdf › data/results/merged/figures/average_example_add.pdf]

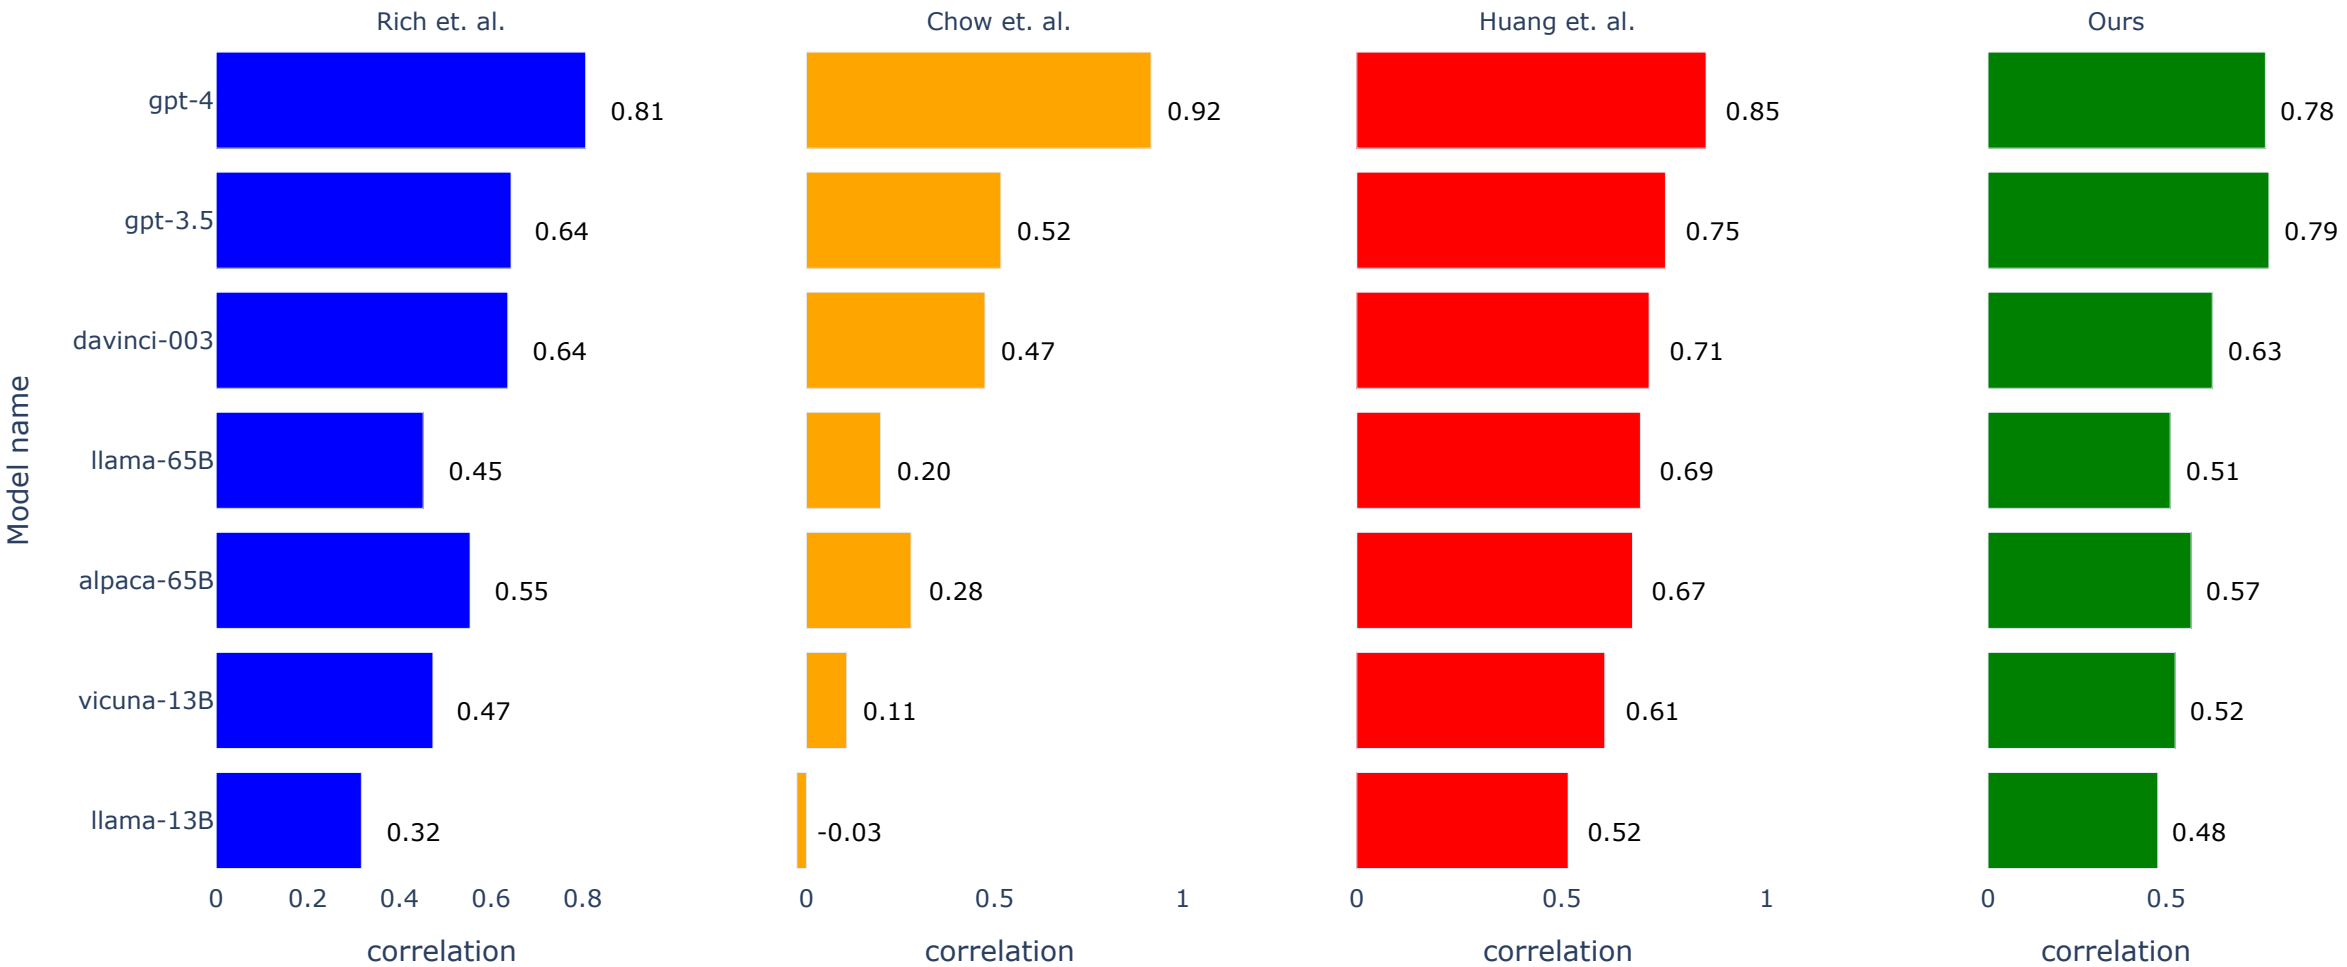

Supplement: note [file average_max_corr.pdf › data/results/merged/figures/average_max_corr.pdf]

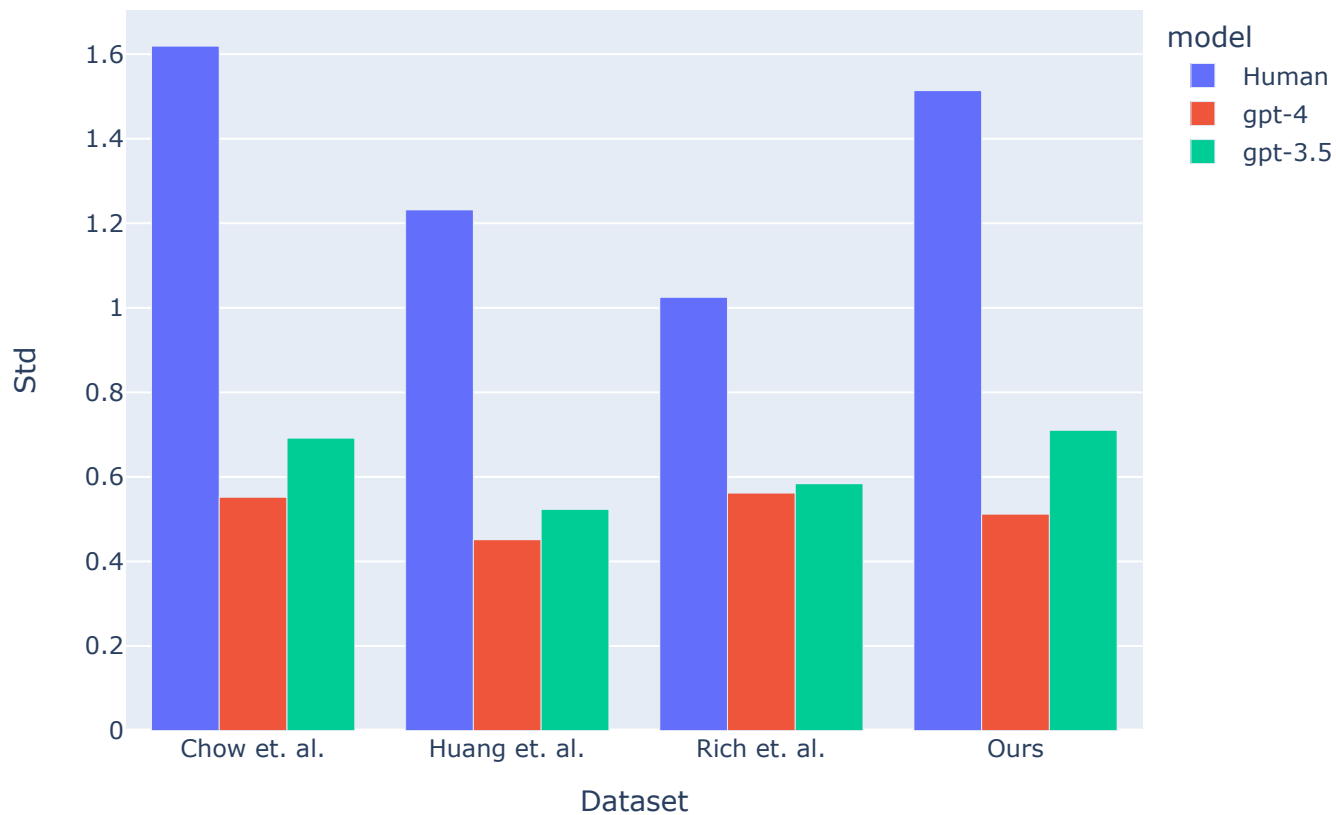

Supplement: note [file average_max_var.pdf › data/results/merged/figures/average_max_var.pdf]

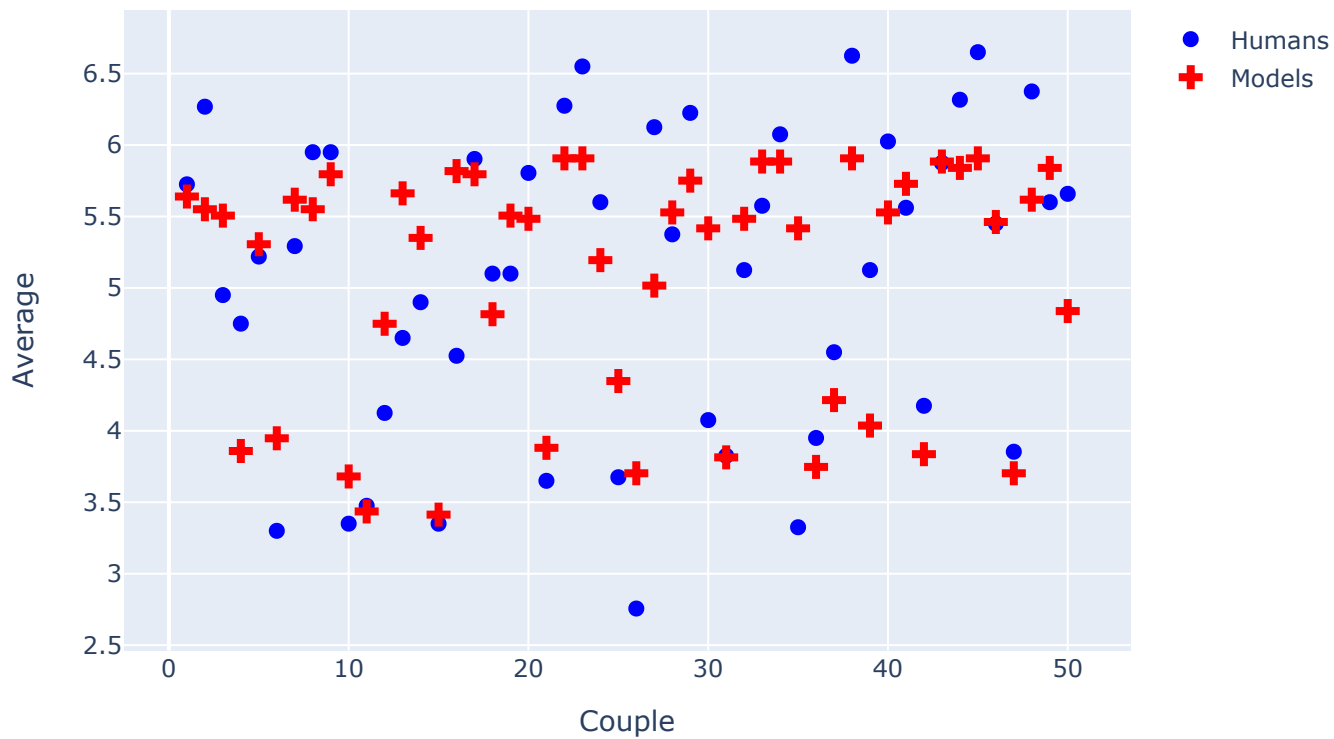

Supplement: note [file average_same_couple.pdf › data/results/merged/figures/average_same_couple.pdf]

## Humans

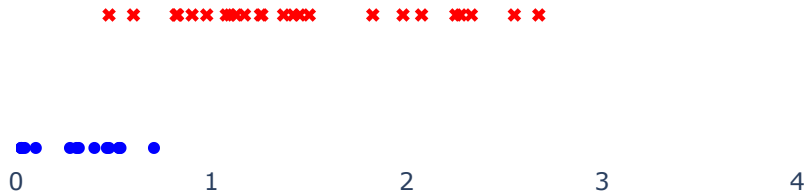

## GPT-3.5

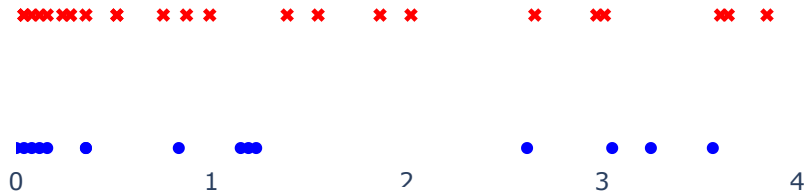

● Accepted

× Rejected

Supplement: note [file diff_sig_mod_human.pdf › data/results/merged/figures/diff_sig_mod_human.pdf]

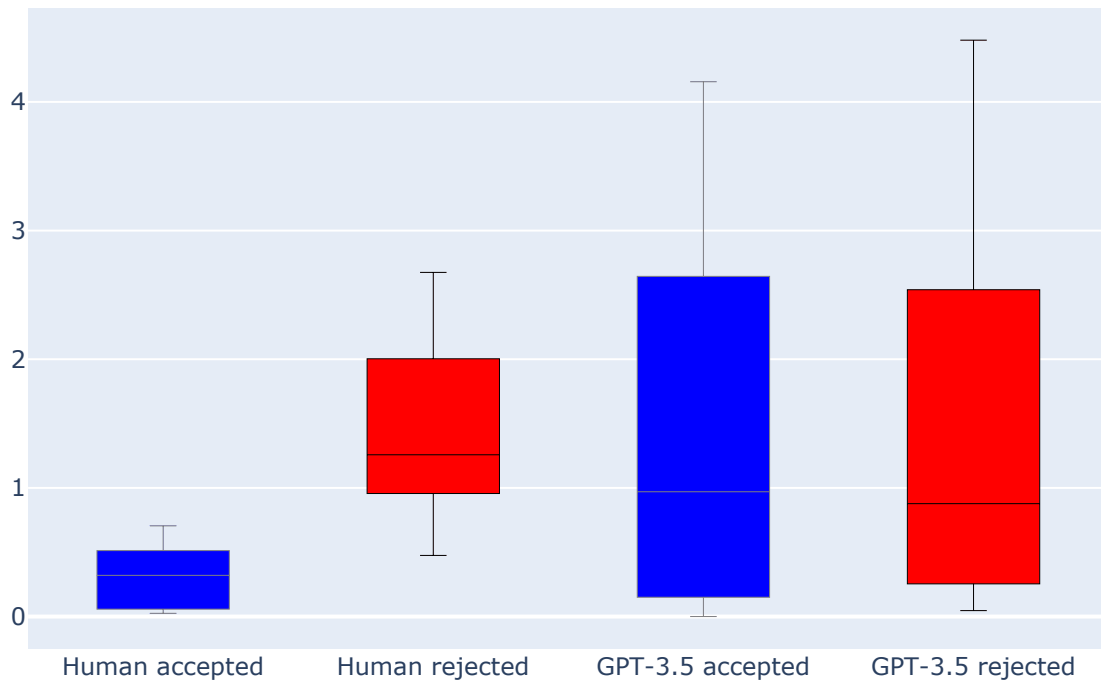

Supplement: note [file diff_sig_mod_human_v2.pdf › data/results/merged/figures/diff_sig_mod_human_v2.pdf]

## False negative rate

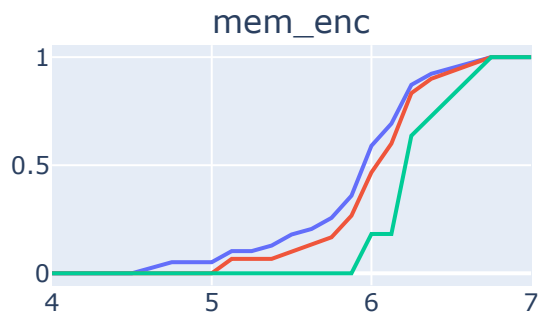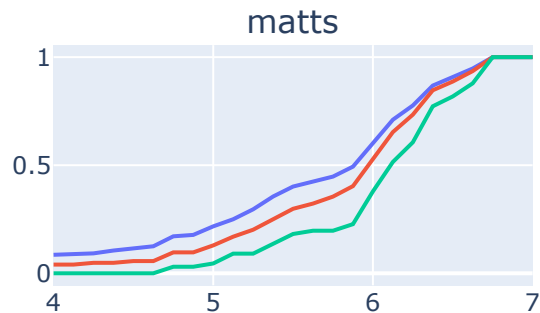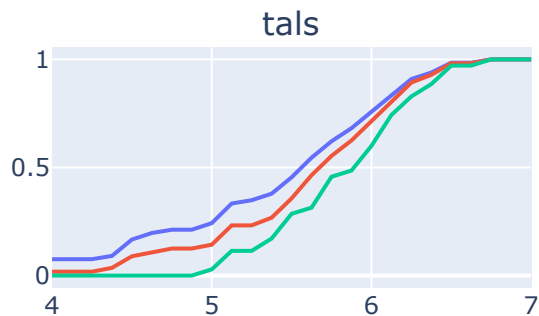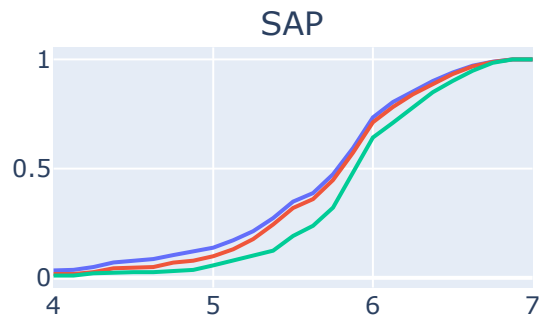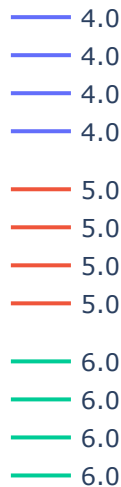

Supplement: note [file false_negative_rate_global.pdf › data/results/merged/figures/false_negative_rate_global.pdf]

## False negative rate

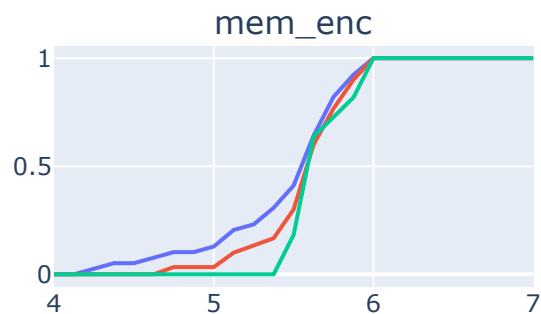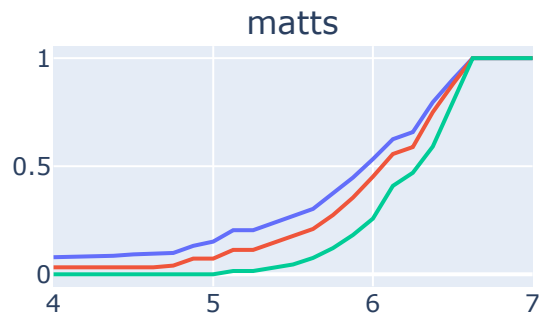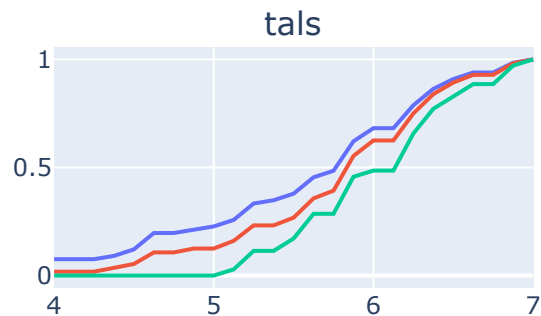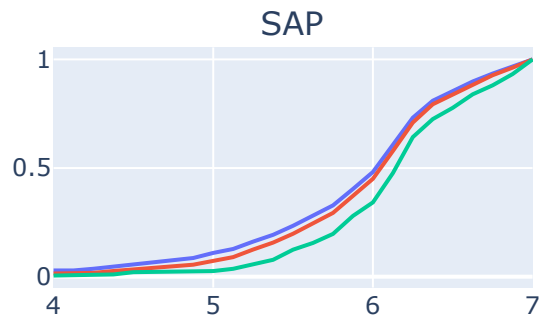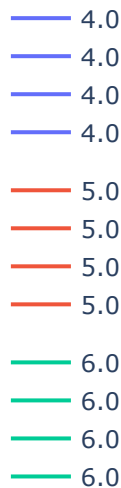

Supplement: note [file false_negative_rate_with judgements.pdf › data/results/merged/figures/false_negative_rate_with judgements.pdf]

## False positive rate

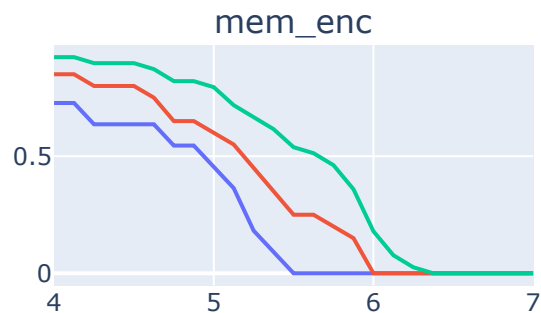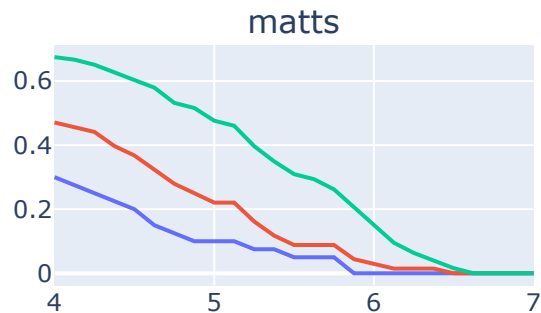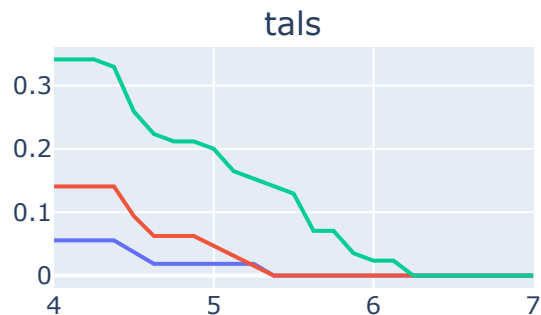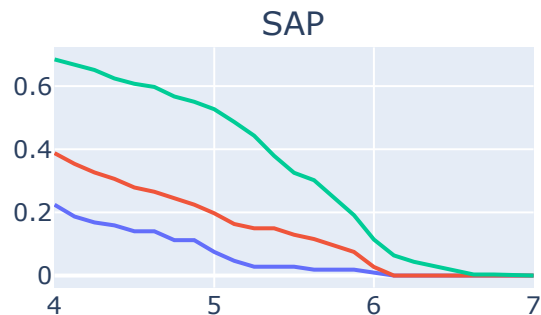

Supplement: note [file false_positive_rate_global.pdf › data/results/merged/figures/false_positive_rate_global.pdf]

## False positive rate

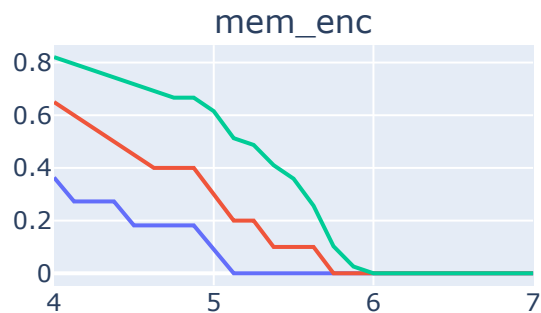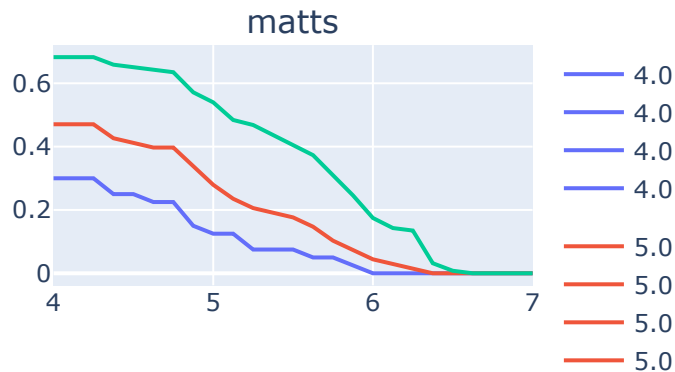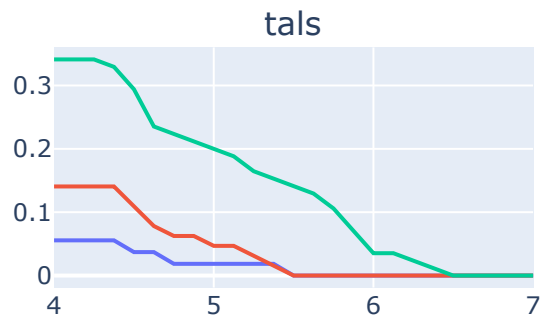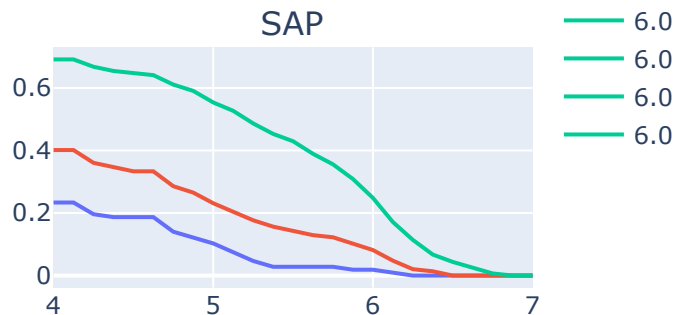

Supplement: note [file false_positive_rate_with judgements.pdf › data/results/merged/figures/false_positive_rate_with judgements.pdf]

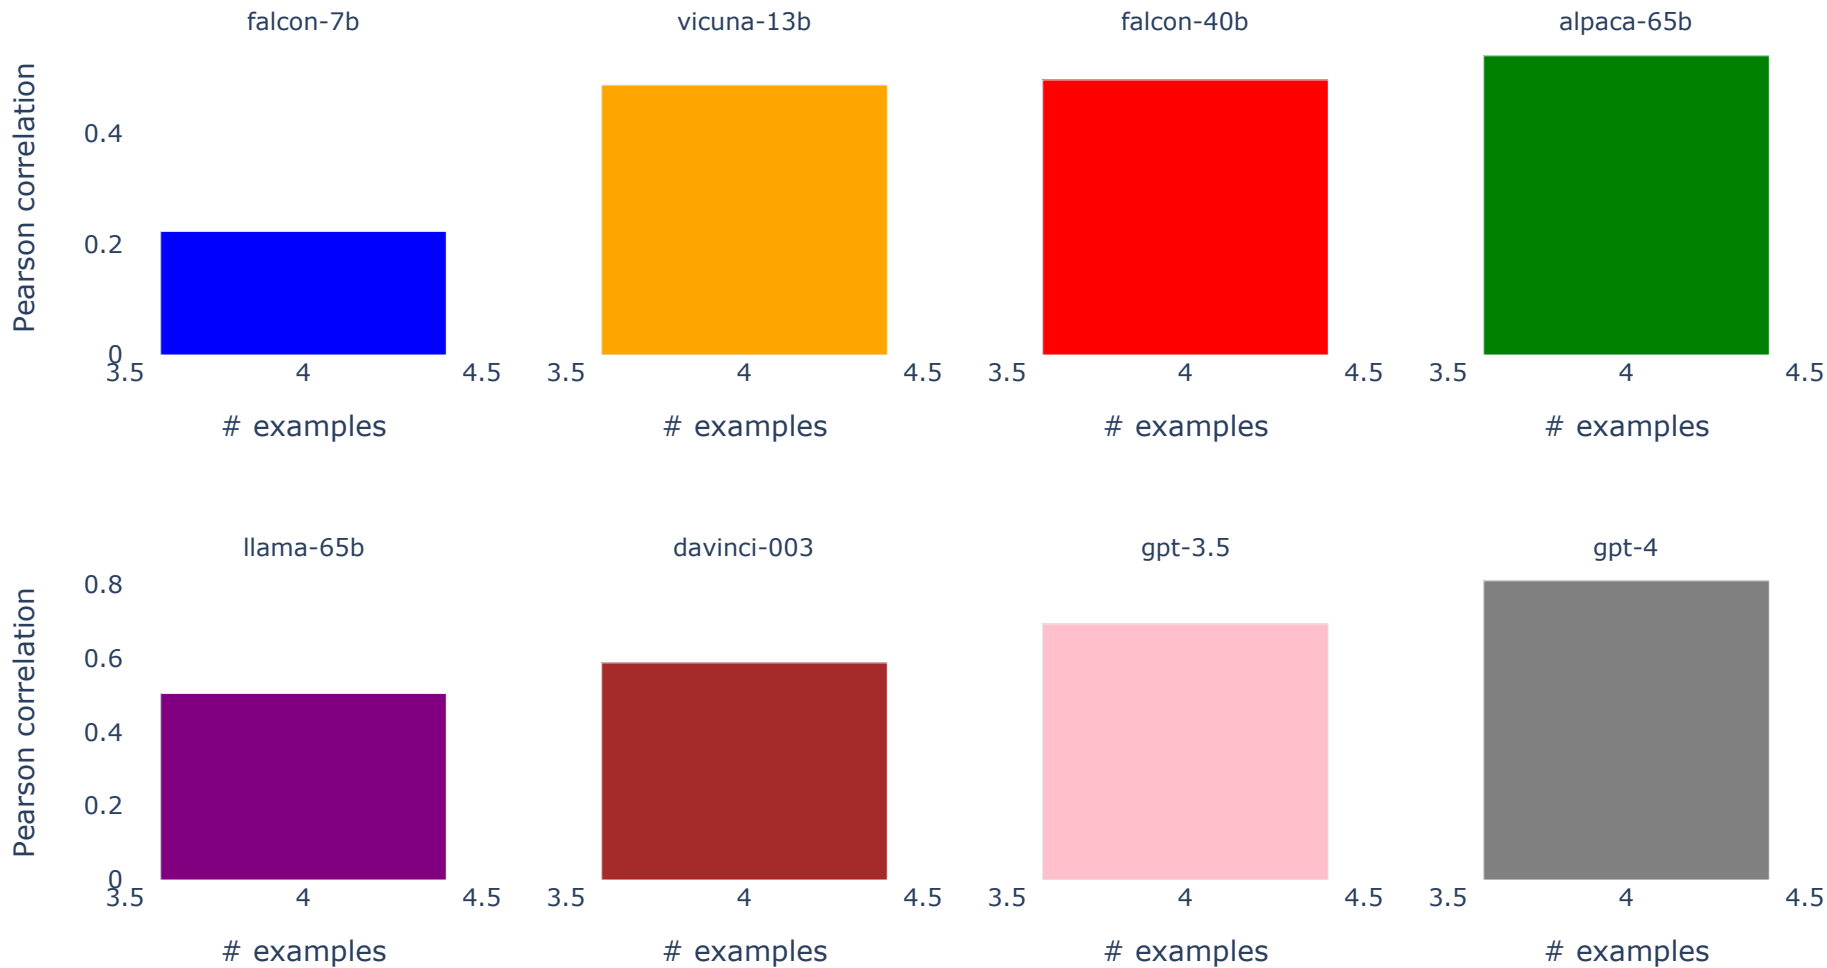

Supplement: note [file global_num_ex.pdf › data/results/merged/figures/global_num_ex.pdf]

Rich et. al.

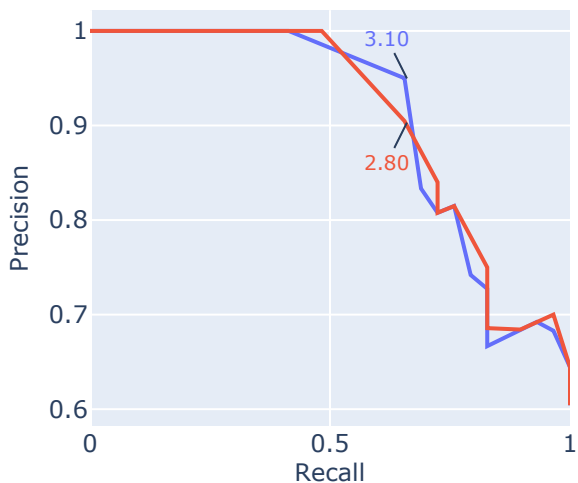

Chow et. al.

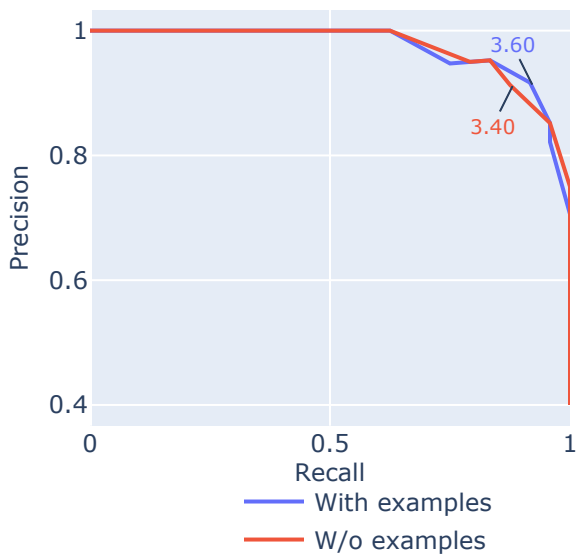

Supplement: note [file lowerbounds_rec_prec_2.pdf › data/results/merged/figures/lowerbounds_rec_prec_2.pdf]

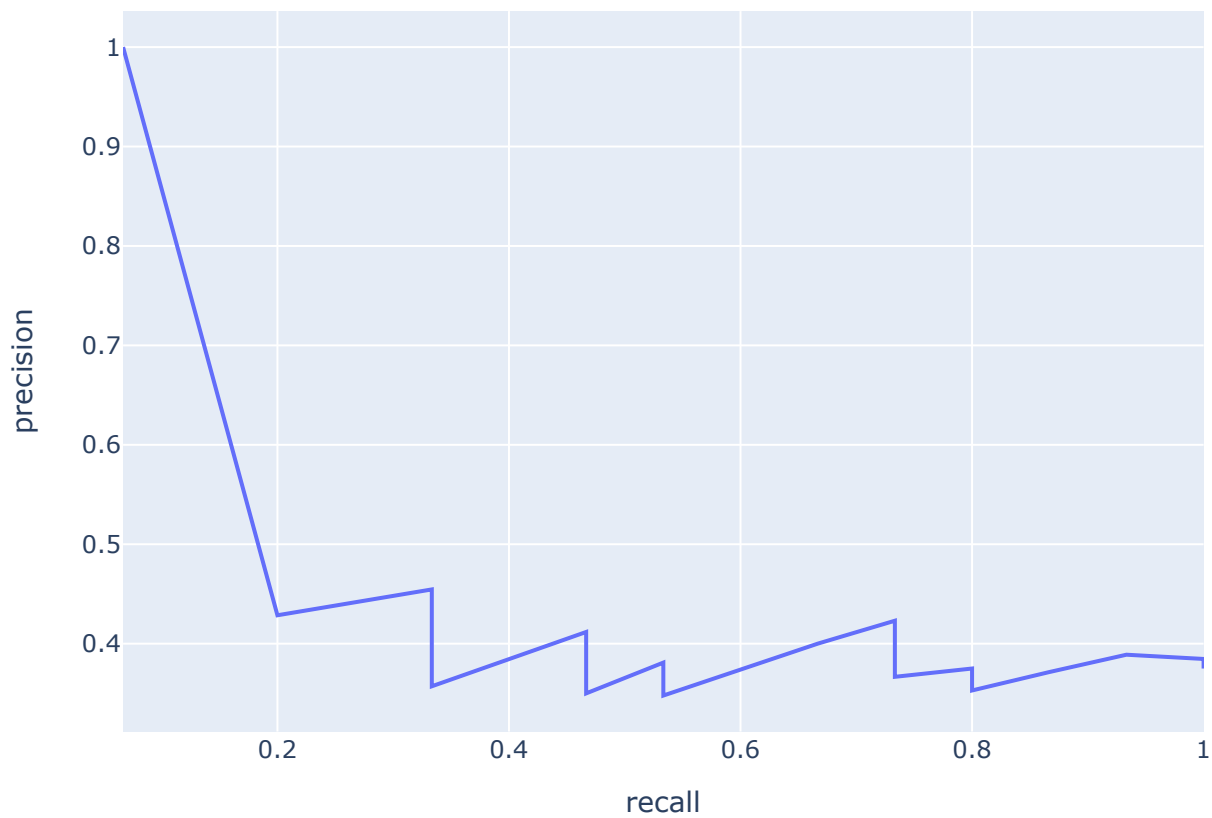

Supplement: note [file mem_enc_prec_rec.pdf › data/results/merged/figures/mem_enc_prec_rec.pdf]

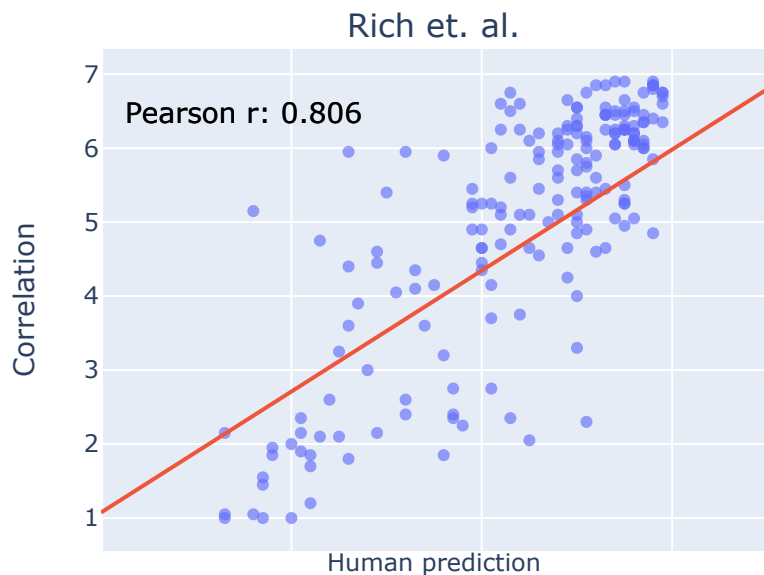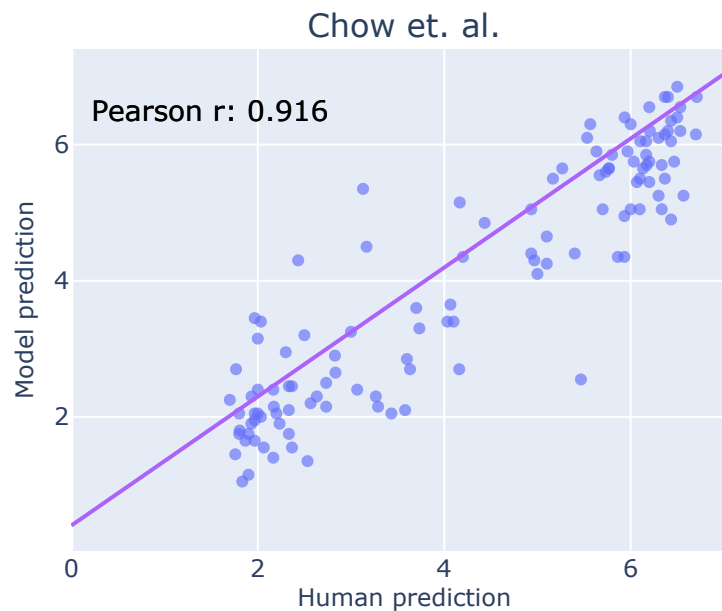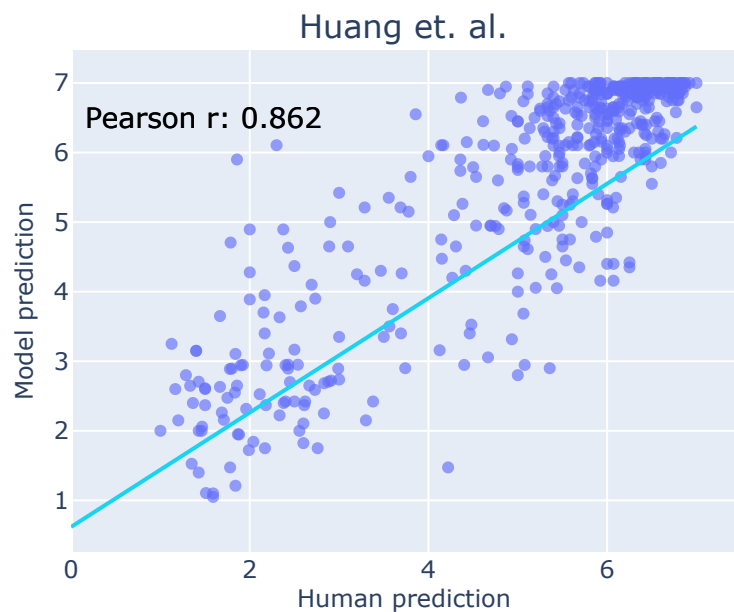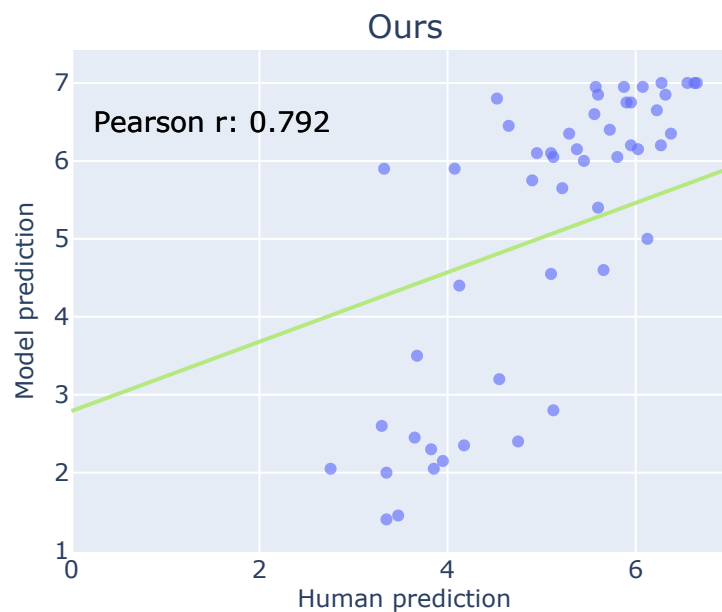

Pearson r: 0.818, Intercept: 1.075    Pearson r: 0.947, Intercept: 0.404  
Pearson r: 0.822, Intercept: 0.619    Pearson r: 0.445, Intercept: 2.79

Supplement: note [file model_pred_human_pred.pdf › data/results/merged/figures/model_pred_human_pred.pdf]

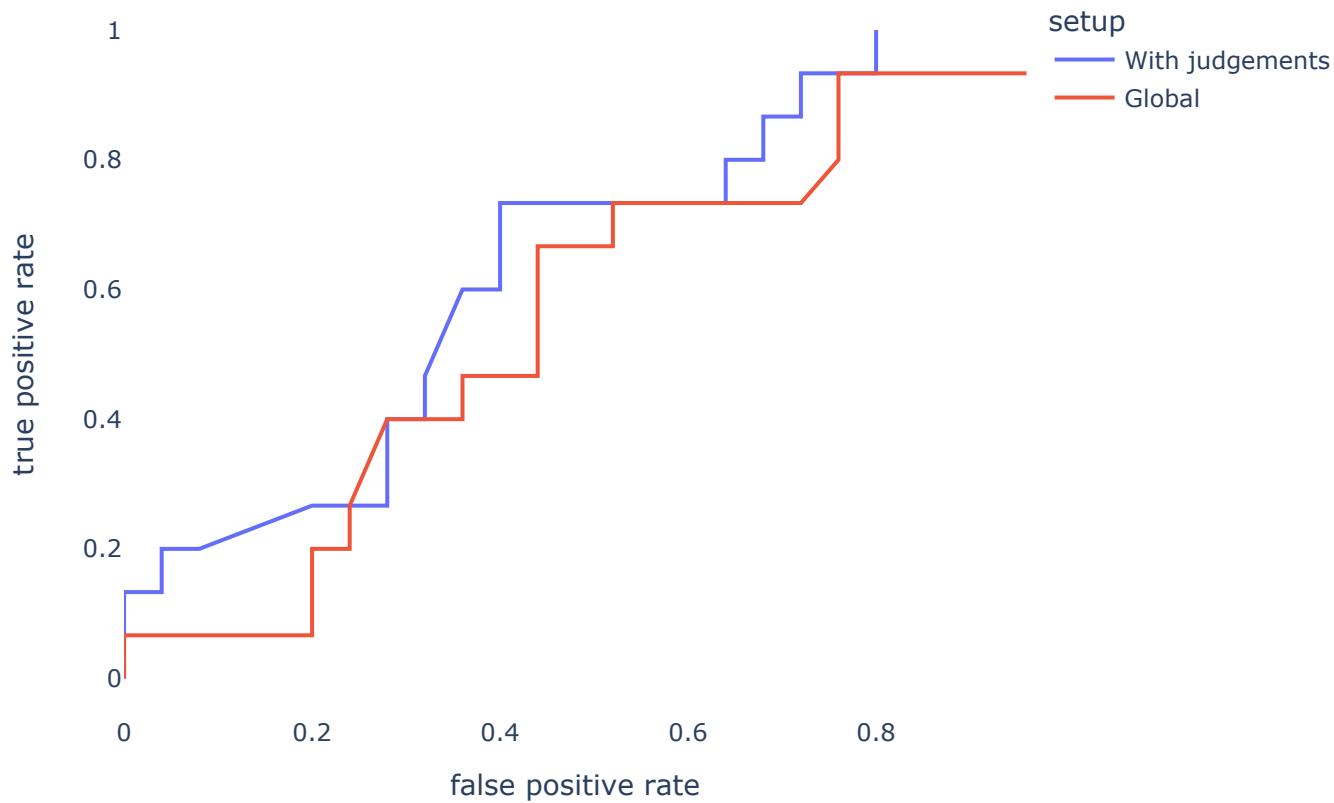

Supplement: note [file roc_tt_setup.pdf › data/results/merged/figures/roc_tt_setup.pdf]

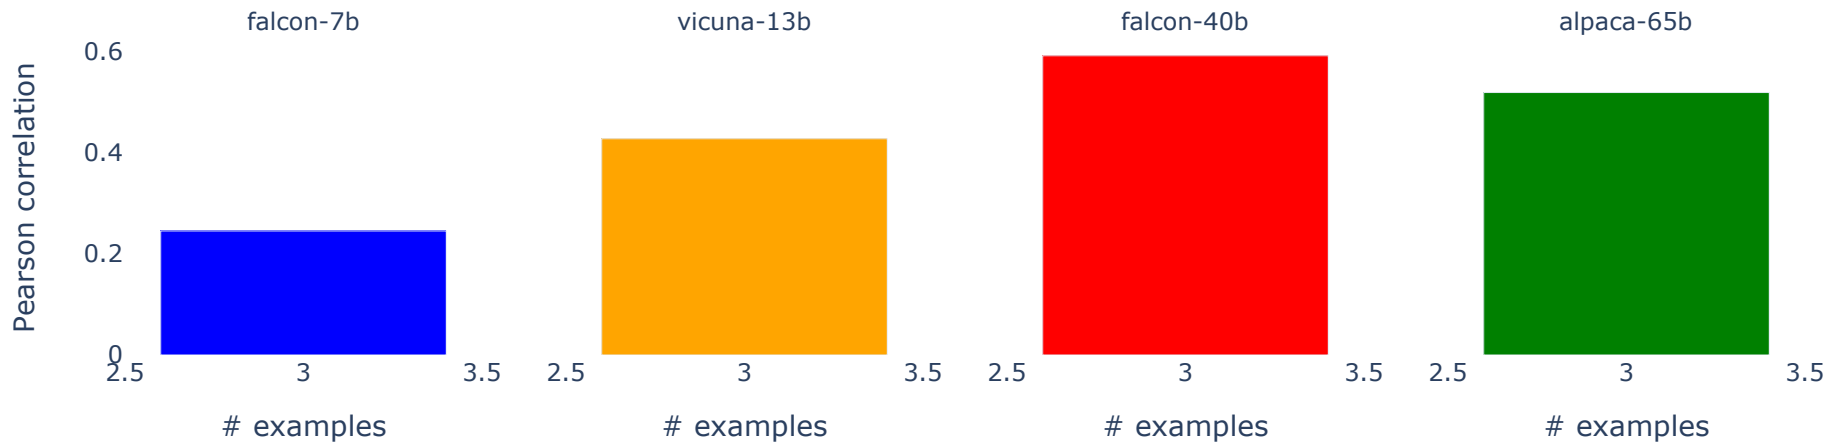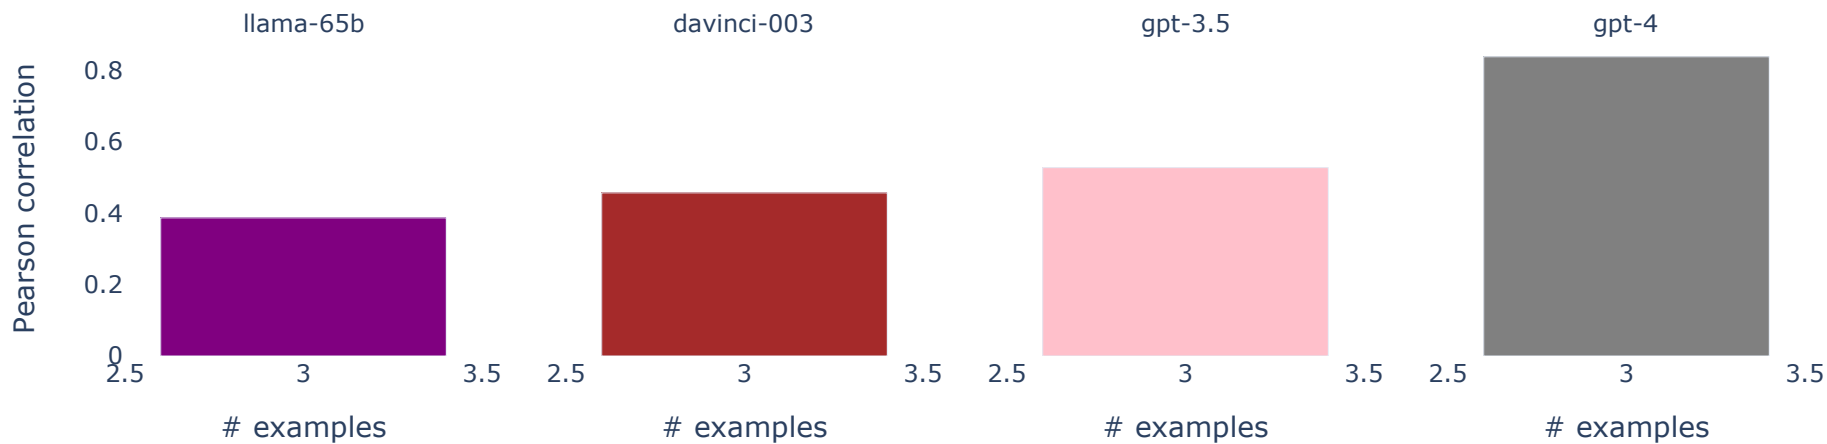

Supplement: note [file spec_num_ex.pdf › data/results/merged/figures/spec_num_ex.pdf]

Rich et. al.

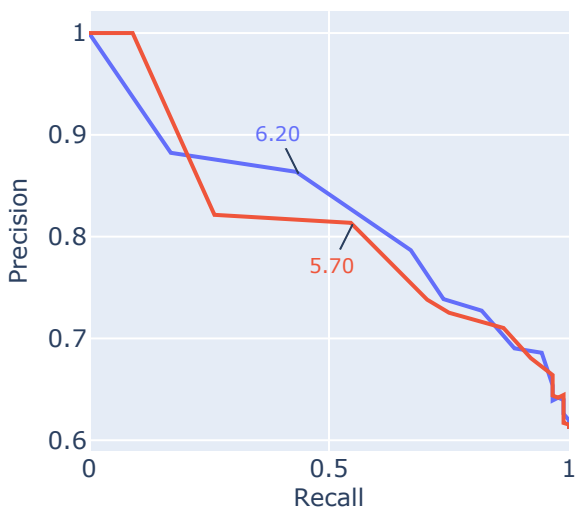

Chow et. al.

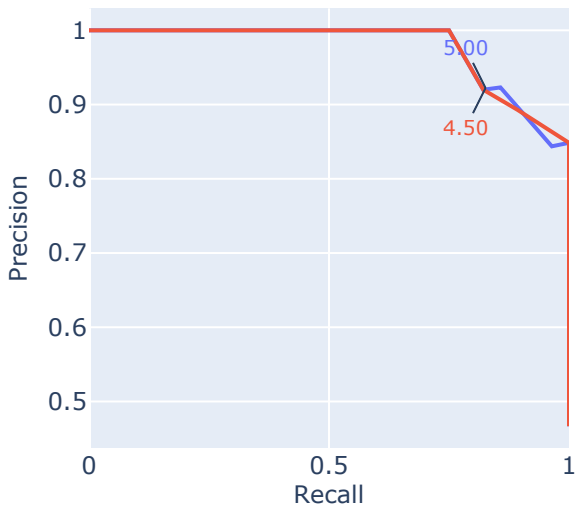

Huang et. al.

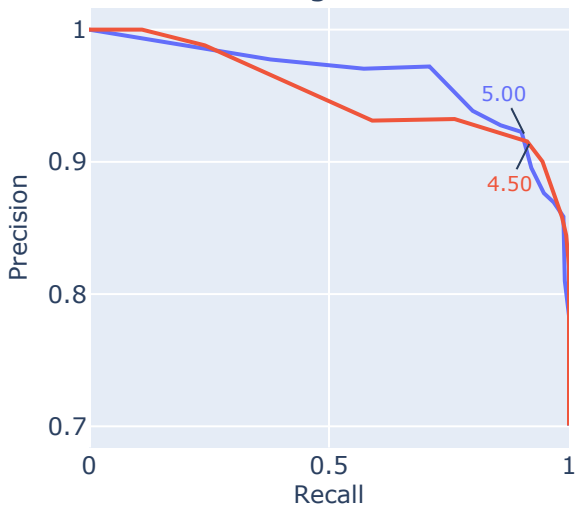

— With examples  
— W/o examples

Supplement: note [file upperbounds_rec_prec_2.pdf › data/results/merged/figures/upperbounds_rec_prec_2.pdf]

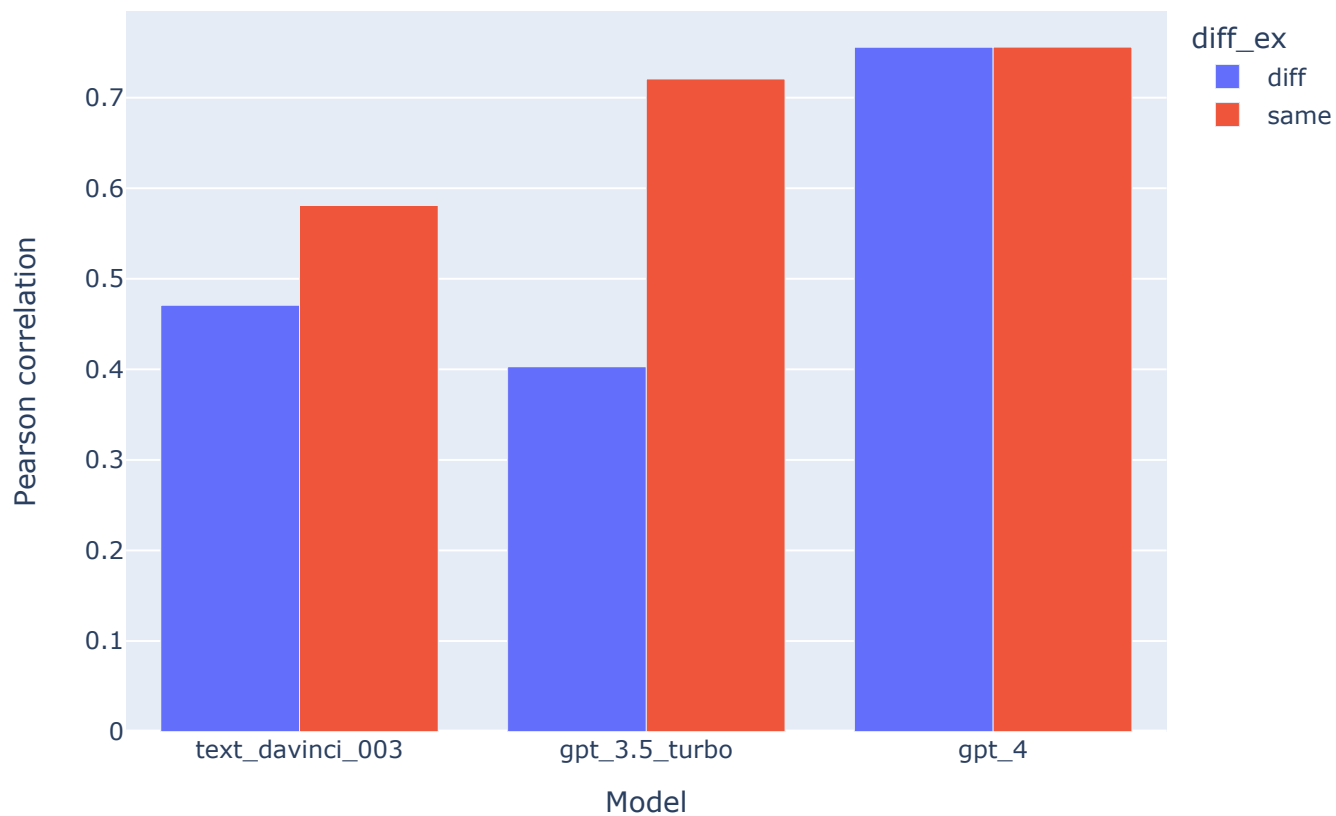

Supplement: note [file average_diff_add.pdf › data/results/openai/figures/average_diff_add.pdf]

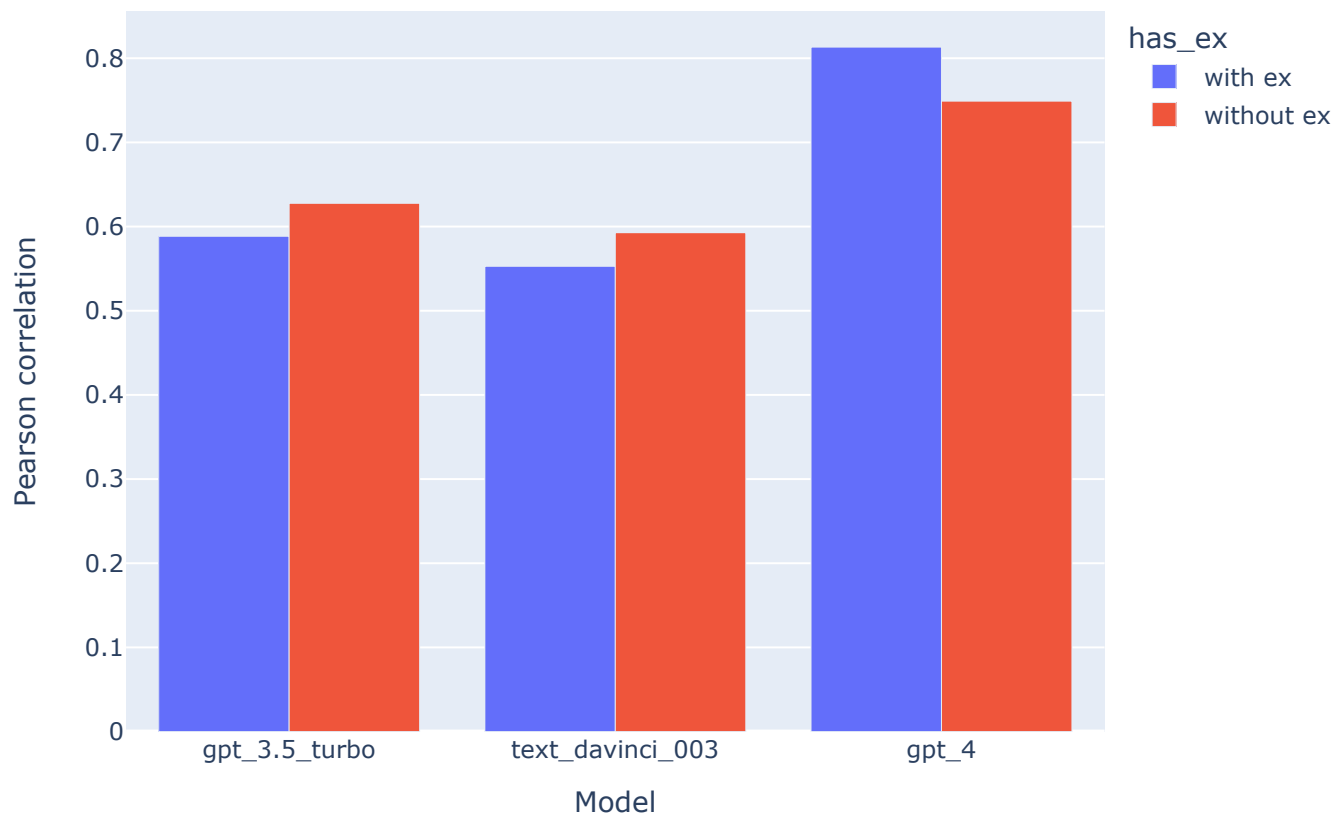

Supplement: note [file average_example_add.pdf › data/results/openai/figures/average_example_add.pdf]

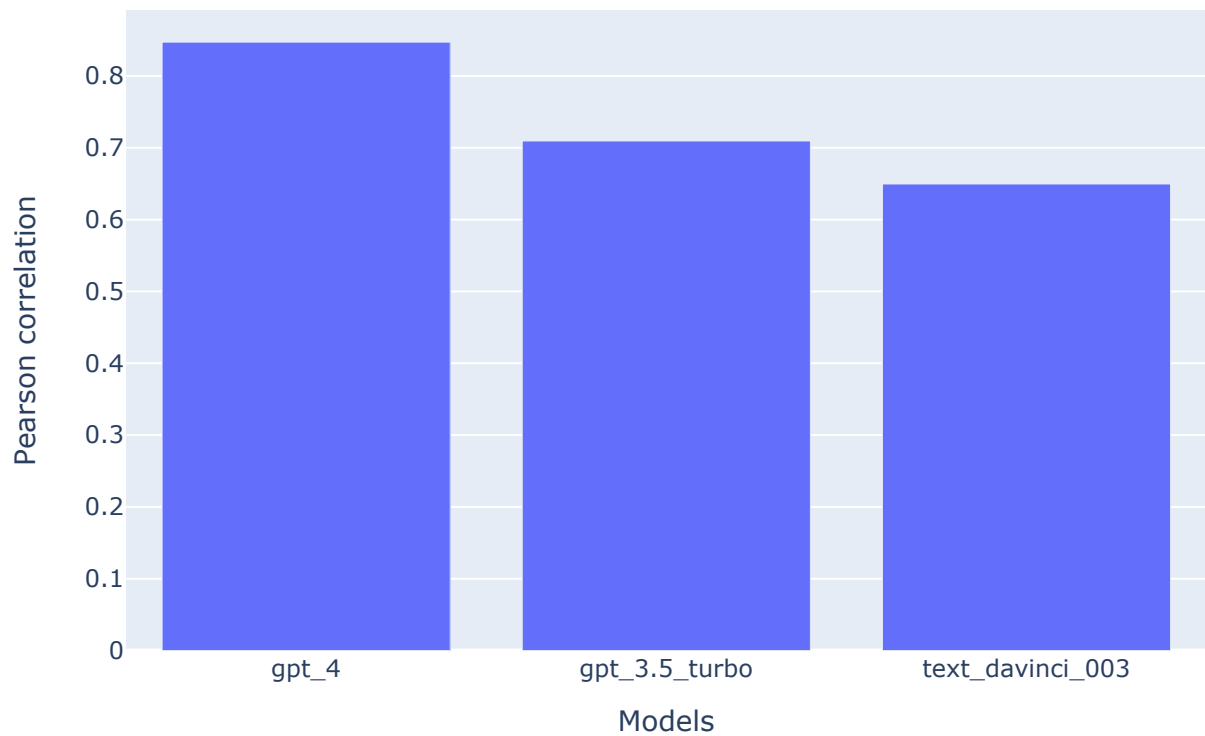

Supplement: note [file average_max_corr.pdf › data/results/openai/figures/average_max_corr.pdf]

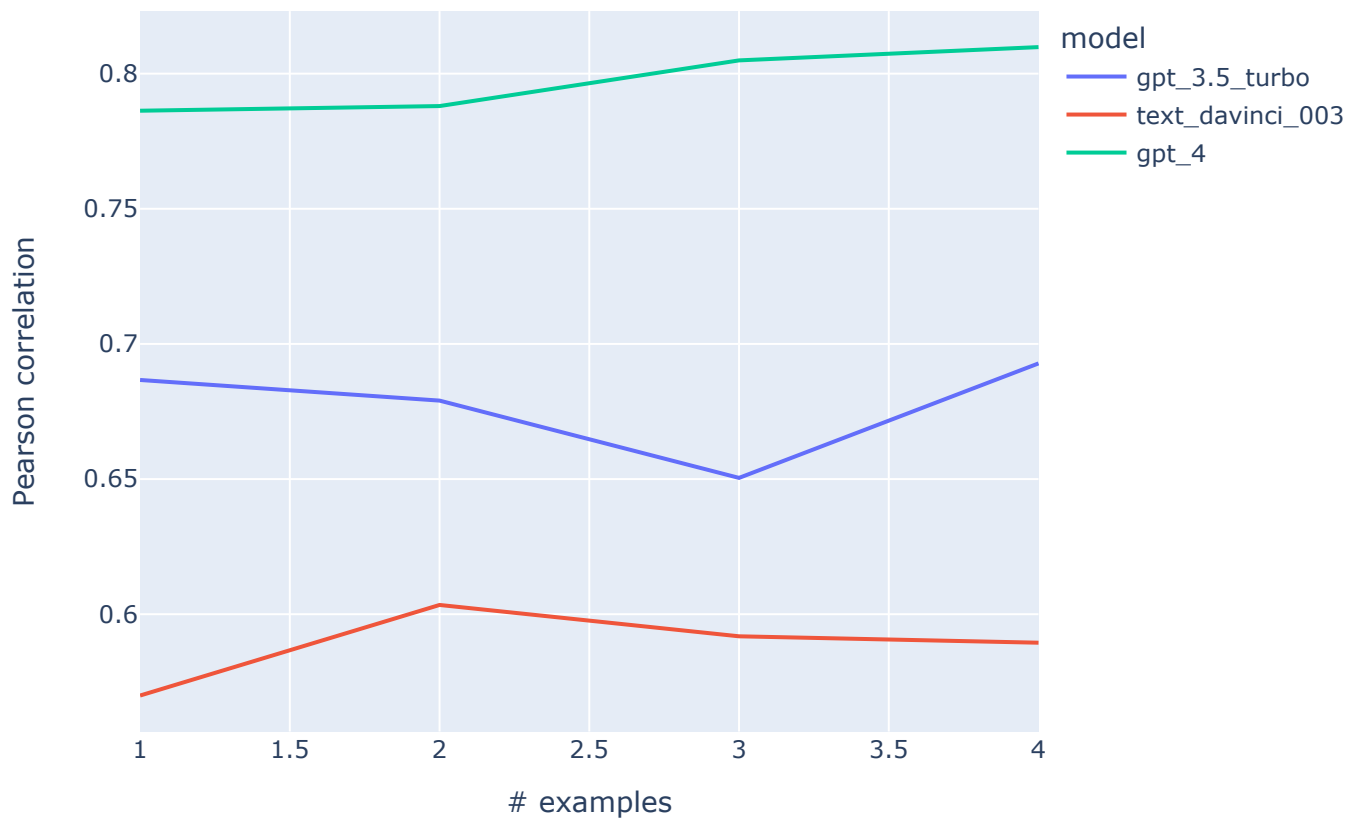

Supplement: note [file global_num_ex.pdf › data/results/openai/figures/global_num_ex.pdf]

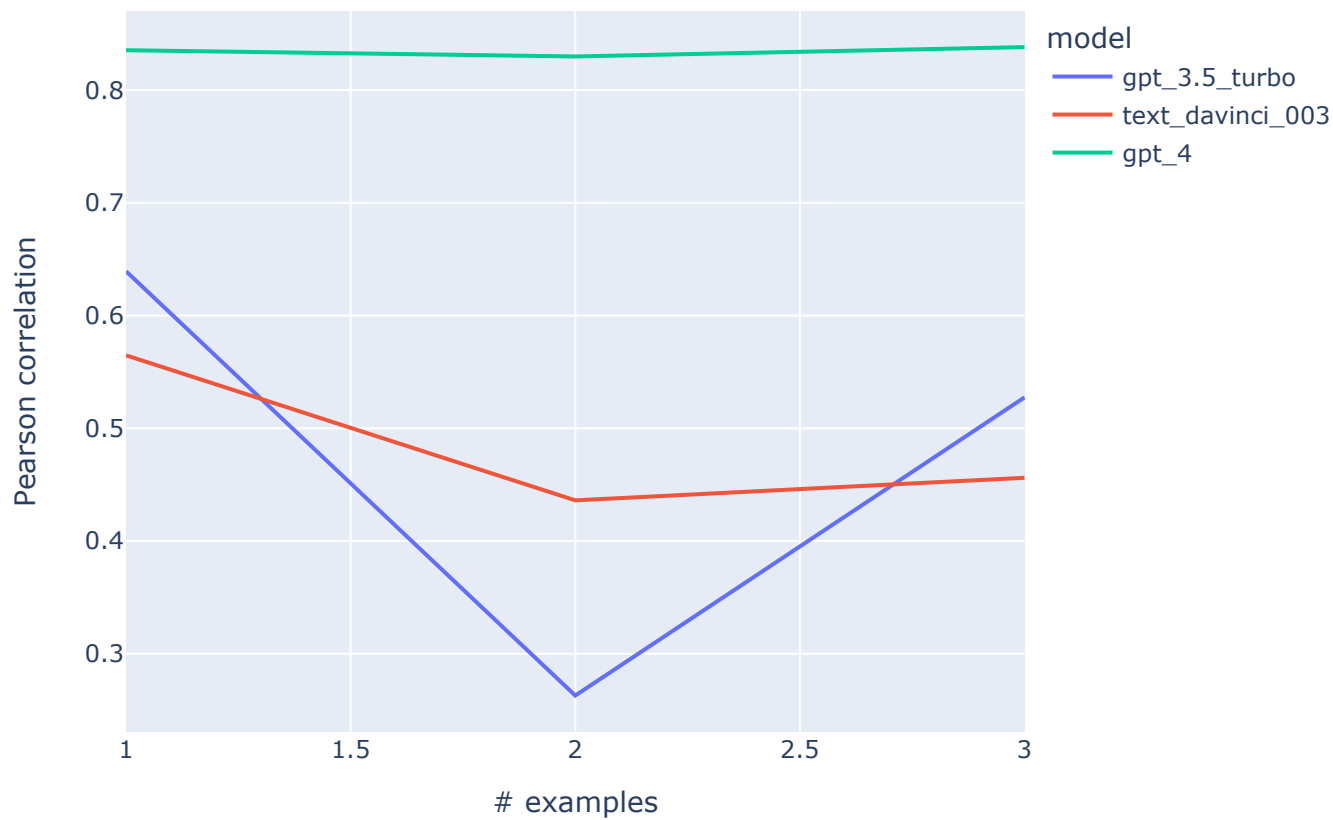

Supplement: note [file spec_num_ex.pdf › data/results/openai/figures/spec_num_ex.pdf]
